# Supplementary material for: Health beliefs mediates the association between the number of non-communicable diseases and preventive behaviors in middle-aged and older adults in southern China
Source: Springer Nature journal article supplement (doi:10.1007/s40520-025-02939-3), 2025-02-25
Supplement: MOESM1 [file 40520_2025_2939_MOESM1_ESM.pdf]

**Article title:** Health beliefs mediates the association between the number of non-communicable diseases and preventive behaviors in middle-aged and older adults in southern China

**Journal name:** Aging Clinical and Experimental Research

**Author names:** Yali Huang <sup>1,2</sup>, Tingjun Wang <sup>1,3,4</sup>, Huajun Wang <sup>1</sup>, Yongjun Zeng <sup>1</sup>, Liangdi Xie <sup>1,3,4,5,6,7</sup>

**Affiliation:** <sup>1</sup> Fujian Hypertension Research Institute, The First Affiliated Hospital of Fujian Medical University, Fuzhou, 350005, China

<sup>2</sup> The School of Public Health, Fujian Medical University, Fuzhou, China

<sup>3</sup> Department of General Practice, National Regional Medical Center, Binhai Campus of the First Affiliated Hospital, Fujian Medical University, Fuzhou, China

<sup>4</sup> Department of General Practice, The First Affiliated Hospital of Fujian Medical University, Fuzhou, China

<sup>5</sup> Department of Geriatrics, The First Affiliated Hospital of Fujian Medical University, Fuzhou, China

<sup>6</sup> Department of Geriatrics, National Regional Medical Center, Binhai Campus of the First Affiliated Hospital, Fujian Medical University, Fuzhou, China

<sup>7</sup> Branch of National Clinical Research Center for Aging and Medicine, Fujian Province, Fujian Provincial Clinical Research Center for Geriatric Hypertension Disease, Fuzhou, China

**Corresponding author:** Liangdi, Xie; MD, PhD; Address: Department of Geriatrics, The First Affiliated Hospital of Fujian Medical University, 20 Chazhong Road, Fuzhou, Fujian 350005, China; Email: [ldxiield@163.com](mailto:ldxiield@163.com); Tel: 86-13509369323.

**Table S1** Characteristics of study participants(N=2095).

| Characteristics                     |                     | Number (%) |
|-------------------------------------|---------------------|------------|
| Sex                                 | Male                | 872(41.6)  |
|                                     | Female              | 1223(58.4) |
| Age(years)                          | 45~59               | 1697(81.0) |
|                                     | 60~74               | 343(16.4)  |
|                                     | ≥75                 | 55(2.6)    |
| Education levels                    | Elementary school   | 24(1.1)    |
|                                     | Middle/high school  | 626(29.9)  |
|                                     | University or above | 1445(69.0) |
| Marital status                      | Married             | 1931(92.2) |
|                                     | Widowed/others      | 164(7.8)   |
| Working status                      | Employed            | 1376(65.7) |
|                                     | Unemployed          | 67(3.2)    |
|                                     | Retired             | 461(22.0)  |
|                                     | Others              | 191(9.1)   |
| Monthly family income (RMB)         | < 3000              | 167(8.0)   |
|                                     | 3000-6000           | 735(35.1)  |
|                                     | 6000-10000          | 653(31.2)  |
|                                     | ≥10000              | 540(25.8)  |
| Region of residence                 | Rural               | 80(3.8)    |
|                                     | Suburban            | 406(19.4)  |
|                                     | Urban               | 1609(76.8) |
| Health insurance coverage           | Yes                 | 2070(98.8) |
|                                     | No                  | 25(1.2)    |
| Living arrangement                  | Alone               | 101(4.8)   |
|                                     | With others         | 1994(95.2) |
| Number of non-communicable diseases | 0                   | 922(44.0)  |
|                                     | 1                   | 487(23.2)  |
|                                     | 2                   | 352(16.8)  |
|                                     | ≥3                  | 334(15.9)  |

**Figure S1** Fitting model of health beliefs.

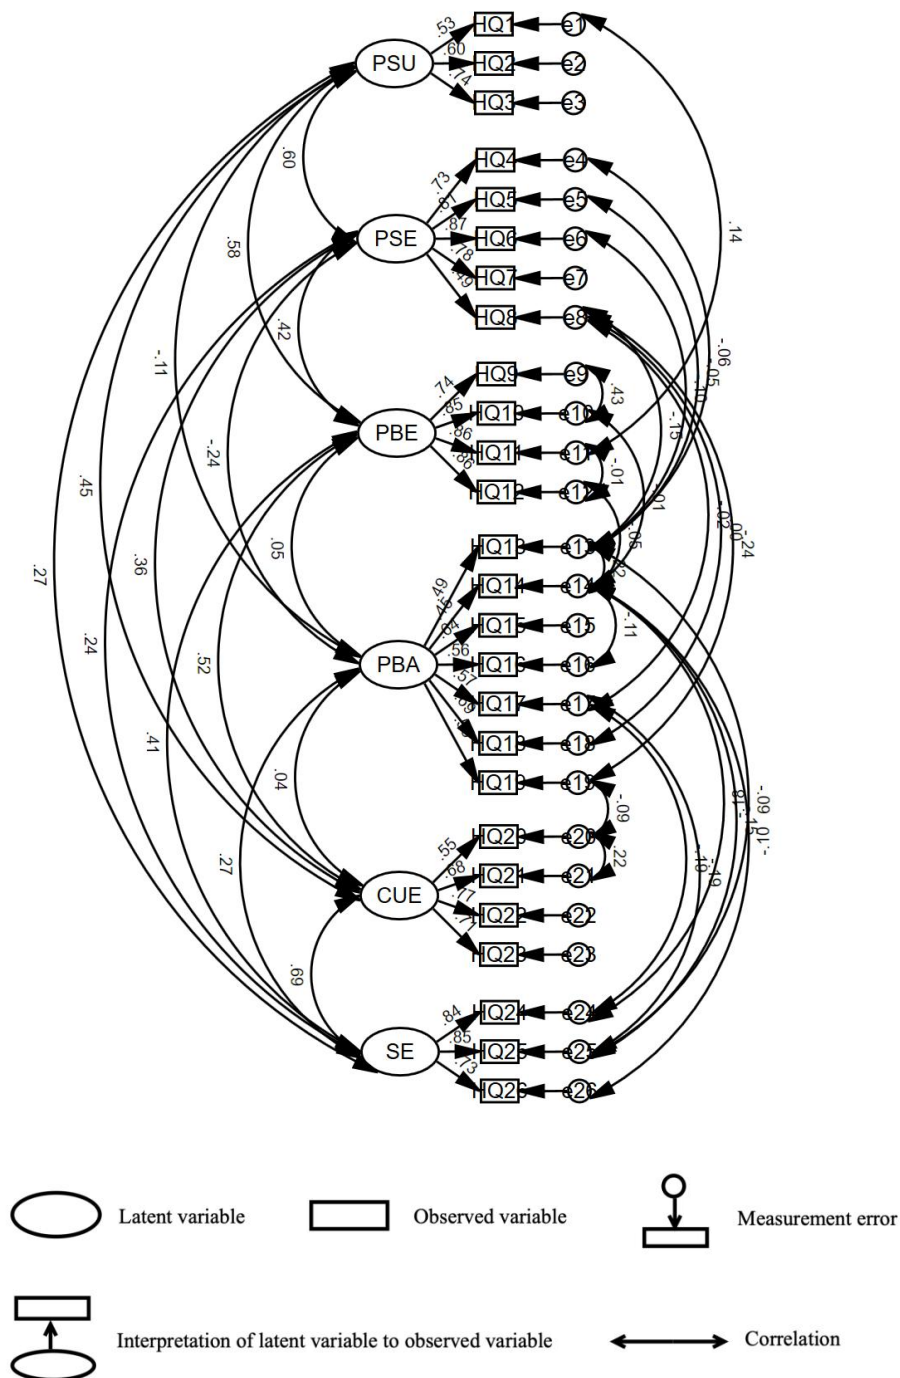

Note: An empirical model was built based on the correlation of health belief model constructs.  
 PSU: perceived susceptibility; PSE: perceived severity; PBE: perceived benefits; PBA: perceived barriers; CUE: cues to action; SE: self-efficacy.  
 HQ: health belief item.

**Table S2 Reliability and validity analysis.**

| Items                                     | Index                                          | Criteria                             | Value                                                                                                                                                                                                                                                                           |                  |
|-------------------------------------------|------------------------------------------------|--------------------------------------|---------------------------------------------------------------------------------------------------------------------------------------------------------------------------------------------------------------------------------------------------------------------------------|------------------|
| Internal consistency                      | Cronbach's $\alpha$                            | >0.70                                | Health beliefs= 0.793; Perceived susceptibility = 0.650                                                                                                                                                                                                                         |                  |
|                                           |                                                |                                      | Perceived severity=0.839; Perceived benefits=0.905                                                                                                                                                                                                                              |                  |
|                                           |                                                |                                      | Perceived barriers=0.775; Cues to action=0.779                                                                                                                                                                                                                                  |                  |
|                                           |                                                |                                      | Self-efficacy=0.848; Preventive behaviors=0.752                                                                                                                                                                                                                                 |                  |
| Exploratory factor analyses               | Kaiser-Meyer-Olkin (KMO)                       | KMO > 0.70                           | The results of the KMO and Bartlett's test were 0.893 and 23406.757, respectively. Additionally, the significance level of Bartlett's test was significant ( $\chi^2 = 23406.757$ , df = 325, $P < 0.001$ ), indicating that performing EFA on this questionnaire is justified. |                  |
|                                           | Bartlett's test                                | Bartlett's test< 0.05 ( $P < 0.05$ ) |                                                                                                                                                                                                                                                                                 |                  |
|                                           | $\chi^2$ /df                                   | <3                                   |                                                                                                                                                                                                                                                                                 | 1062/262 = 4.053 |
| Confirmatory factor analyses: Fit indices | Root Mean Square Error of Approximation, RMSEA | <0.08                                |                                                                                                                                                                                                                                                                                 | 0.038            |
|                                           | Standardized Root Mean Square Residual, SRMR   | <0.08                                | 0.034                                                                                                                                                                                                                                                                           |                  |
|                                           | Goodness of Fit Index, GFI                     | > 0.90                               | 0.962                                                                                                                                                                                                                                                                           |                  |
|                                           | Normed Fit Index, NFI                          | > 0.90                               | 0.955                                                                                                                                                                                                                                                                           |                  |
|                                           | Comparative Fit Index, CFI                     | >0.90                                | 0.965                                                                                                                                                                                                                                                                           |                  |
| Convergent validity                       | Tucker Lewis index, TLI                        | >0.90                                | 0.957                                                                                                                                                                                                                                                                           |                  |
|                                           | Average Variances Extracted, AVE               | >0.50                                | Perceived susceptibility=0.397; Perceived severity=0.558                                                                                                                                                                                                                        |                  |
|                                           |                                                |                                      | Perceived benefits=0.685; Perceived barriers=0.334                                                                                                                                                                                                                              |                  |
|                                           |                                                |                                      | Cues to action=0.478; Self-efficacy=0.655                                                                                                                                                                                                                                       |                  |
|                                           | Composite Reliability, CR                      | >0.70                                | Perceived susceptibility=0.660; Perceived severity=0.860                                                                                                                                                                                                                        |                  |

Perceived benefits=0.897; Perceived barriers=0.776

Cues to action=0.783; Self-efficacy=0.850

**Table S3 Multiple linear regression analysis of preventive behaviors.**

| Variables                       | Model 1 |          | Model 2 |           | Model 3 |           | Model 4 |           | Model 5 |           |
|---------------------------------|---------|----------|---------|-----------|---------|-----------|---------|-----------|---------|-----------|
|                                 | $\beta$ | <i>P</i> | $\beta$ | <i>P</i>  | $\beta$ | <i>P</i>  | $\beta$ | <i>P</i>  | $\beta$ | <i>P</i>  |
| Number of NCDs (0 as Reference) |         |          |         |           |         |           |         |           |         |           |
| 1                               | - 0.008 | 0.734    | 0.024   | 0.286     | 0.027   | 0.183     | - 0.005 | 0.795     | 0.007   | 0.735     |
| 2                               | - 0.050 | 0.032*   | - 0.027 | 0.211     | - 0.022 | 0.269     | - 0.063 | 0.003**   | - 0.047 | 0.015*    |
| ≥3                              | - 0.081 | 0.001**  | - 0.040 | 0.071     | - 0.020 | 0.313     | - 0.107 | <0.001**  | - 0.067 | <0.001*** |
| Health beliefs                  |         |          | 0.356   | <0.001*** | /       |           | 0.358   | <0.001*** | /       |           |
| Perceived susceptibility        |         |          |         |           | 0.028   | 0.210     |         |           | 0.027   | 0.218     |
| Perceived severity              |         |          |         |           | - 0.129 | <0.001*** |         |           | - 0.088 | <0.001*** |
| Perceived benefits              |         |          |         |           | 0.002   | 0.923     |         |           | 0.010   | 0.655     |
| Perceived barriers              |         |          |         |           | 0.284   | <0.001*** |         |           | 0.268   | <0.001*** |
| Cues to action                  |         |          |         |           | 0.052   | 0.030*    |         |           | 0.050   | 0.033*    |
| Self-efficacy                   |         |          |         |           | 0.366   | <0.001*** |         |           | 0.340   | <0.001*** |
| Sex                             |         |          |         |           |         |           |         |           |         |           |
| Male(Ref)                       |         |          |         |           |         |           |         |           |         |           |
| Female                          |         |          |         |           |         |           | 0.126   | <0.001*** | 0.105   | <0.001*** |
| Age(years)                      |         |          |         |           |         |           |         |           |         |           |
| 45~59(Ref)                      |         |          |         |           |         |           |         |           |         |           |
| 60~74                           |         |          |         |           |         |           | 0.188   | <0.001*** | 0.156   | <0.001*** |
| ≥75                             |         |          |         |           |         |           | 0.132   | <0.001*** | 0.103   | <0.001*** |

|                             |         |         |         |        |
|-----------------------------|---------|---------|---------|--------|
| Education levels            |         |         |         |        |
| Elementary school(Ref)      |         |         |         |        |
| Middle/high school          | 0.182   | 0.039*  | 0.200   | 0.015* |
| University or above         | 0.124   | 0.170   | 0.157   | 0.061  |
| Marital status              |         |         |         |        |
| Married(Ref)                |         |         |         |        |
| Widowed/others              | 0.008   | 0.723   | 0.005   | 0.802  |
| Working status              |         |         |         |        |
| Employed(Ref)               |         |         |         |        |
| Unemployed                  | 0.002   | 0.930   | − 0.001 | 0.955  |
| Retired                     | 0.073   | 0.007** | 0.020   | 0.426  |
| Others                      | 0.011   | 0.577   | 0.001   | 0.973  |
| Monthly family income (RMB) |         |         |         |        |
| < 3000(Ref)                 |         |         |         |        |
| 3000-6000                   | − 0.025 | 0.528   | − 0.012 | 0.740  |
| 6000-10000                  | − 0.003 | 0.933   | 0.003   | 0.929  |
| ≥10000                      | 0.013   | 0.743   | 0.019   | 0.599  |
| Region of residence         |         |         |         |        |
| Rural(Ref)                  |         |         |         |        |
| Suburban                    | 0.074   | 0.104   | 0.059   | 0.161  |
| Urban                       | 0.083   | 0.082   | 0.067   | 0.129  |

|                           |        |           |           |           |        |           |        |           |        |           |
|---------------------------|--------|-----------|-----------|-----------|--------|-----------|--------|-----------|--------|-----------|
| Health insurance coverage |        |           |           |           |        |           |        |           |        |           |
| Yes(Ref)                  |        |           |           |           |        |           |        |           |        |           |
| No                        |        |           |           |           |        |           | 0.006  | 0.746     | -0.003 | 0.864     |
| Living arrangement        |        |           |           |           |        |           |        |           |        |           |
| Alone(Ref)                |        |           |           |           |        |           |        |           |        |           |
| With others               |        |           |           |           |        |           | 0.016  | 0.454     | 0.029  | 0.132     |
| Constants                 | 44.229 | <0.001*** | 20.540    | <0.001*** | 24.718 | <0.001*** | 12.824 | <0.001*** | 17.486 | <0.001*** |
| Adjusted $R^2$            | 0.006  |           | 0.130     |           | 0.286  |           | 0.220  |           | 0.331  |           |
| $F$                       | 4.955  | 0.002**   | 79.436*** | <0.001*** | 94.321 | <0.001*** | 30.529 | <0.001*** | 42.408 | <0.001*** |

\*  $P < 0.05$ , \*\*  $P < 0.01$ , \*\*\*  $P < 0.001$ .

Note: Perceived barriers are scored inversely, with a higher score indicating fewer perceived barriers and a lower score indicating more perceived barriers.

Model 1 was an unadjusted model. Model 2 and 3 were adjusted for health beliefs and six dimensions based on the HBM (perceived susceptibility, perceived severity, perceived benefits, perceived barriers, cues to action, self-efficacy). Model 4 and 5 were further adjusted for demographic characteristics (sex, age, education, marital status, employment status, monthly family income, region of residence, health insurance coverage, living arrangement).
